# Supplementary material
Source: PubMed Central journal article supplement (PMC1924538)

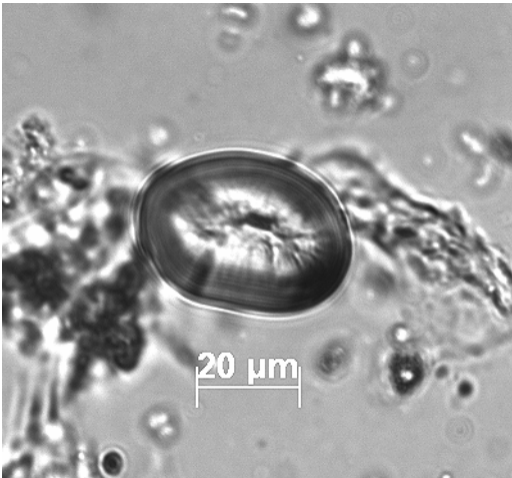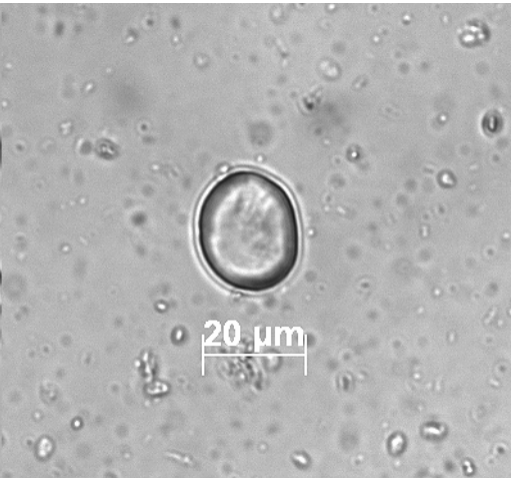

Supplement: pnas_0704936104_1.pdf [file pnas_0704936104_1.pdf]
